# Supplementary material
Source: publisher figshare collection journal article supplement (https://acs.figshare.com/ndownloader/files/4749646)
Supplement: Supplementary file 1 [file 4749646]

## Supporting Information

# Unraveling the Aflatoxin-FAPY Conundrum: Structural Basis for Differential Replicative Processing of Isomeric Forms of the Formamidopyrimidine-type DNA Adduct of Aflatoxin B<sub>1</sub>

*Kyle L. Brown, James Z. Deng, Rajkumar S. Iyer, Lalitha G. Iyer, Markus W. Voehler,*

*Michael P. Stone, Constance M. Harris and Thomas M. Harris\**

| Item                                                                                                                | Page |
|---------------------------------------------------------------------------------------------------------------------|------|
| Preparative Synthesis and Isolation of <b>13</b>                                                                    | S3   |
| Isolation of <b>15</b>                                                                                              | S3   |
| NMR Studies                                                                                                         | S4   |
| Table S1. $^{13}\text{C}$ Chemical shifts of <b>13</b>                                                              | S6   |
| Table S2. $^1\text{H}$ and $^{13}\text{C}$ Chemical shifts of <b>15</b>                                             | S7   |
| Figure S1. UV spectra of <b>6-A</b> and <b>6-B</b>                                                                  | S8   |
| Figure S2. $^1\text{H}$ NMR spectrum of <b>6-A</b>                                                                  | S9   |
| Figure S3. $^1\text{H}$ NMR spectrum of <b>6-B</b>                                                                  | S9   |
| Figure S4. $^1\text{H}$ NMR spectrum of <b>10</b>                                                                   | S10  |
| Figure S5. UV spectrum of <b>10</b>                                                                                 | S10  |
| Figure S6. UV spectrum of <b>11</b>                                                                                 | S11  |
| Figure S7. $^1\text{H}$ NMR spectrum of <b>11</b>                                                                   | S11  |
| Figure S8. $^{13}\text{C}$ NMR spectra of AFB C6 and C8 in <b>11</b> with 6- $^{16}\text{O}$ and 6- $^{18}\text{O}$ | S12  |
| Figure S9. $^1\text{H}$ NMR spectrum of <b>13-Aab</b>                                                               | S13  |
| Figure S10. $^1\text{H}$ NMR spectrum of <b>13-Bab</b>                                                              | S13  |
| Figure S11. $^1\text{H}$ - $^{15}\text{N}$ COSY spectrum of <b>13</b>                                               | S14  |
| Figure S12. $^{15}\text{N}$ INEPT spectrum of <b>13</b>                                                             | S14  |
| Figure S13. UV spectra of <b>13-A</b> and <b>13-B</b>                                                               | S15  |
| Figure S14. UV spectrum of <b>15</b>                                                                                | S16  |
| Figure S15. $^1\text{H}$ NMR spectrum of <b>15</b>                                                                  | S16  |

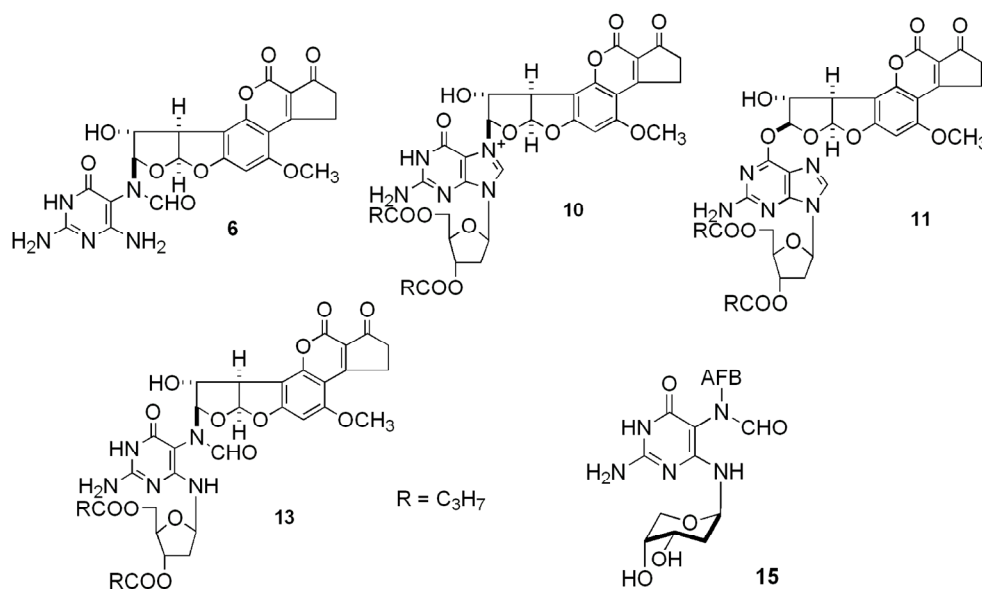

**Preparative Synthesis and Isolation of 13.** The mixture containing **10** was made basic with 10 mL of pH 9.5 buffer (15 mM Na<sub>2</sub>CO<sub>3</sub>/30 mM NaHCO<sub>3</sub>) and stirred overnight at ambient temperature. Neutralization using 0.1 M HCl was followed by lyophilization to remove solvents. The residue was dissolved in 4 mL of methanol and clarified by filtration through a 0.45 µm filter. The methanolic solution was fractionated by reverse-phase HPLC (Econosil ODS, 10 µm, 250 x 10 mm, Alltech Associates; 0-67% linear gradient of CH<sub>3</sub>CN in water over 40 min; 3.0 mL/min; UV detection at 358 nm). The AFB-FAPY adducts described in this study eluted as a mixture of the major and minor isomers at 33 min. This fraction was collected and lyophilized to afford a mixture of FAPYs A and B in 45-50% combined yield. Separation of the FAPY isomers (**13**-FAPYs A and B) was carried out using reverse-phase HPLC (Econosphere ODS, 5 µm, 250 x 4.6 mm, Alltech Associates; 60% CH<sub>3</sub>OH/H<sub>2</sub>O; 1.0 mL/min; UV detection at 360 nm). Retention times of FAPY A and FAPY B were 22.4 and 29.8 min, respectively. The isomers were collected over Dry Ice/acetone and lyophilized.

**Isolation of 15.** The methanolic solution was fractionated by reverse-phase HPLC (Econosil ODS, 10 x 250 mm, 10 µm, Alltech Associates; stepwise gradient of MeOH-H<sub>2</sub>O as follows: 20 mL 5% MeOH, 100mL 10% MeOH, 50 mL 15% MeOH, 50 mL 20% MeOH, 50 mL 22% MeOH, 100 mL 25% MeOH and finally 100% MeOH; 3.0 mL/min; UV detection at 360 nM. The poorly resolved AFB-FAPY adducts eluted as a mixture of isomers at 100 and 110 min. These fractions were collected and lyophilized to afford the adducts in a total yield of 40-50%. The 100 min peak, which was the major fraction, was dissolved in 50 mL of 10% aqueous methanol and re-fractionated on the same column with a different gradient (100 mL 10% MeOH, 100mL 15% MeOH, 100 mL 20% MeOH, 100 mL 22% MeOH and finally 100 mL 25% MeOH. Four peaks at retention

times 137, 147, 154 and 156 min were obtained. The major peaks (137 (FAPY **15-A**) and 147 min (FAPY **15-B**)) were collected and lyophilized. They were characterized by NMR and MS. FAPY **15-A** was further analyzed by two-dimensional NMR. The 110 minute peak from the first fractionation was similarly separated using the above gradient; it was a mixture of components similar to the original 100 min fraction.

**NMR Studies.** Routine spectra were recorded on Bruker AC-300 and AM-400 instruments operating at 300.13 MHz and 400.13 MHz, respectively. Two-dimensional spectra were recorded on a Bruker AMX-500 spectrometer at 500.13 MHz. NMR samples of AFB-FAPY nucleoside were prepared as ~0.01 M solution in a mixture of MeOH-*d*<sub>4</sub>/DMSO-*d*<sub>6</sub> (9:1) except for the ROESY, which was performed in pure DMSO-*d*<sub>6</sub> to keep the exchangeable protons visible. The [<sup>15</sup>N] labeled AFB-FAPY nucleoside was prepared as ~0.01 M solution in a mixture of methanol-*d*<sub>4</sub>/DMSO-*d*<sub>6</sub> (9:1).

<sup>15</sup>N NMR spectra were recorded at 288 K in MeOD/DMSO-*d*<sub>6</sub> (9:1) mixtures at 50.9 MHz on a Bruker AMX-500 spectrometer via an INEPT pulse sequence for non-selective polarization transfer, refocused and <sup>1</sup>H-decoupled during acquisition. The delay between pulses was set to 16.7 ms to optimize for a <sup>3</sup>*J*<sub>NH</sub> of 15 Hz. AFB-FAPY nucleoside **13** showed four signals at δ 133.9, 133.6, 131.7, and 130.8. Proton chemical shifts are reported using the residual <sup>1</sup>H in MeOH-*d*<sub>4</sub> as the internal reference (δ 3.30 ppm) or DMSO-*d*<sub>6</sub> (δ 2.49 ppm) in the ROESY. Carbon shifts are referenced to the CD<sub>3</sub> signal of methanol-*d*<sub>4</sub> at δ 49.0. The 2D spectra were measured with natural abundance samples and at 15 °C if not described otherwise.

Homonuclear 2D studies were carried out using the following experiments: double quantum filtered COSY,<sup>1</sup> TOCSY 250 ms mixing time,<sup>2</sup> NOESY 800 ms mixing time and ROESY 300 ms mixing time.<sup>3</sup> The acquisition conditions were as followed: *f*<sub>1</sub> = *f*<sub>2</sub> =

4504 Hz, 2K in the  $f_2$  dimension and 512 increments in  $f_1$ , 32 or 64 scans, and the data were processed as 2K x 1K matrices with a shifted sine-bell apodization. The ROESY spectrum was measured at 20 °C in anhydrous DMSO- $d_6$  to prevent the exchange of the NH protons. A spectral width  $f_1 = f_2 = 6024$  Hz was chosen and all the other conditions were used as in the other experiments.

Carbon chemical shifts were obtained via HMQC (Heteronuclear Multiple-Quantum Coherence) or HMBC (Heteronuclear Multiple-Bond Coherence) experiments.<sup>4</sup> 2D HMQC spectra were run using the BIRD sequence to suppress the center signal and with carbon decoupling during acquisition in the TPPI mode.<sup>5</sup> The applied pulse sequence for the HMBC experiment was: relaxation delay -  $90^\circ_x(^1\text{H})$  -  $D_1$  -  $90^\circ_{f1}(^{13}\text{C})$  -  $t_1/2$  -  $180^\circ_x(^1\text{H})$  -  $t_1/2$  -  $90^\circ_{f2}(^{13}\text{C})$  - acquire. The HMBC spectrum was recorded using a delay time  $D_1$  of 60 ms. Both heterocorrelation spectra were 2K covering 4504 Hz in the  $f_2$  dimension and 22,727 Hz in the  $f_1$  dimension and were acquired for 512 increments with 64 scans on the HMQC and 128 scans on the HMBC. The data were processed with 2K in the  $f_2$  dimension and 1K in the  $f_1$  dimension with a shifted sine apodization.

**Table S1.**  $^{13}\text{C}$  Chemical Shifts of AFB<sub>1</sub>-FAPY Nucleoside Dibutyrate **13**<sup>a</sup>

| Carbon             | FAPY Ia             | FAPY Ib | FAPY IIa | FAPY IIb |
|--------------------|---------------------|---------|----------|----------|
| <u>Aflatoxin</u>   |                     |         |          |          |
| C6a                | 114.23 <sup>b</sup> |         |          |          |
| C8                 | 95.42               | 102.93  | 95.80    | 103.58   |
| C5                 | 92.13 <sup>b</sup>  |         |          |          |
| C9                 | 75.45               | 75.22   | 76.27    | 76.07    |
| OMe                | 57.30 <sup>b</sup>  |         |          |          |
| C9a                | 55.00 <sup>b</sup>  |         |          |          |
| C2                 | 35.94 <sup>b</sup>  |         |          |          |
| C3                 | 30.14 <sup>b</sup>  |         |          |          |
| <u>Pyrimidine</u>  |                     |         |          |          |
| CHO                | 168.0               | 165.47  | 168.12   | 165.68   |
| C5                 | 92.08               | 89.31   | 92.27    | 89.62    |
| <u>Deoxyribose</u> |                     |         |          |          |
| C1'                | 82.60 <sup>b</sup>  |         |          |          |
| C2'                | 37.33 <sup>b</sup>  |         |          |          |
| C3'                | 76.80 <sup>b</sup>  |         |          |          |
| C4'                | 82.70 <sup>b</sup>  |         |          |          |
| C5'                | 64.56 <sup>b</sup>  |         |          |          |
| <u>Butyrates</u>   |                     |         |          |          |
| CH <sub>3</sub>    | 13.80 <sup>b</sup>  |         |          |          |
| β-CH <sub>2</sub>  | 19.11 <sup>b</sup>  |         |          |          |
| α-CH <sub>2</sub>  | 36.52 <sup>b</sup>  |         |          |          |

<sup>a</sup> Chemical shifts for  $^{13}\text{C}$  signals were determined from HMQC or HMBC 2D spectra recorded in MeOH-*d*<sub>4</sub>/DMSO-*d*<sub>6</sub>. (9:1) mixtures at 290 K. Chemical shifts are in ppm relative to TMS. The chemical shifts are derived from the two-dimensional experiments rather than from a 1-D spectrum. Consequently, their accuracy is subject to data point limitations and signals separated by only a few Hz are not resolved from one another. <sup>b</sup> Only one signal seen for the four FAPY species.

**Table S2.** <sup>1</sup>H and <sup>13</sup>C Chemical Shifts of formyl isomers of FAPY Nucleoside **15**<sup>a,b</sup>

| Proton            | FAPY Aa             | FAPY Ab           | Carbon | FAPY Aa             | FAPY Ab           |
|-------------------|---------------------|-------------------|--------|---------------------|-------------------|
|                   | major               |                   |        | major               | minor             |
| <u>Aflatoxin</u>  |                     |                   |        |                     |                   |
| H5                | 6.39                | 6.35              | C5     | 91 <sup>c</sup>     |                   |
| H6a               | 6.45                | 6.45              | C6a    | 112.9               | 112.6             |
| OH <sup>e</sup>   | 6.08                | 6.07              |        |                     |                   |
| H8                | 6.27                |                   | C8     | 94.6                | 102.1             |
| H9                | 4.92                | 5.08              | C9     | 74.0                | 73.9              |
| OMe               | 3.93                | 3.93              | OMe    | 56.7                |                   |
| H9a               |                     |                   |        |                     |                   |
| <u>Pyrimidine</u> |                     |                   |        |                     |                   |
| NH1               | 9.84 <sup>e</sup>   | 9.64 <sup>e</sup> |        |                     |                   |
| formyl            | 7.57                | 8.33              | C5     | 90.2 <sup>d</sup>   | 87.7 <sup>d</sup> |
| NH2               | 6.6 <sup>e</sup>    | 6.6 <sup>e</sup>  |        |                     |                   |
| NH4               | 6.49 <sup>e</sup>   | 6.52 <sup>e</sup> |        |                     |                   |
| H1'               | 5.12 <sup>e</sup>   | 5.08 <sup>e</sup> | C1'    | 74.6 <sup>c</sup>   |                   |
| H2'               | 1.89 <sup>c</sup>   |                   | C2'    | 33.6 <sup>c</sup>   |                   |
| H3'               | 3.82 <sup>c</sup>   |                   | C3'    | 67.1 <sup>c</sup>   |                   |
| OH3'              | 4.79 <sup>e</sup>   | 4.72 <sup>e</sup> |        |                     |                   |
| H4'               | 3.43 <sup>c</sup>   |                   | C4'    | 66.6 <sup>c</sup>   |                   |
| OH4'              | 4.53 <sup>c,e</sup> |                   |        |                     |                   |
| H5'               | 3.18 <sup>c</sup>   |                   | C5'    | 47.7 <sup>c,d</sup> |                   |
| H5''              | 3.53 <sup>d</sup>   | 3.49 <sup>d</sup> |        |                     |                   |

<sup>a</sup> Spectra were recorded in 4:1 mixtures of DMSO-*d*<sub>6</sub>/MeOH-*d*<sub>4</sub>. Chemical shifts are in ppm relative to TMS. <sup>b</sup>Unless otherwise specified, values for proton and carbon chemical shifts were determined from HMQC 2D spectra. <sup>c</sup>Only one signal was seen for both FAPY species. <sup>d</sup>Values determined from HMBC 2D spectra. <sup>e</sup>Values obtained from spectra recorded in DMSO-*d*<sub>6</sub>. AFB H2 and H3 are not tabulated.

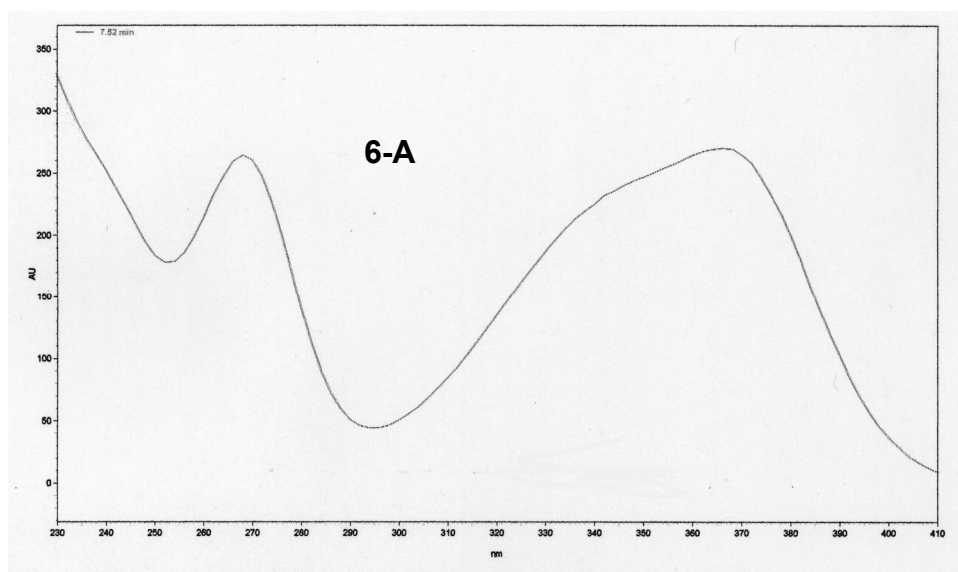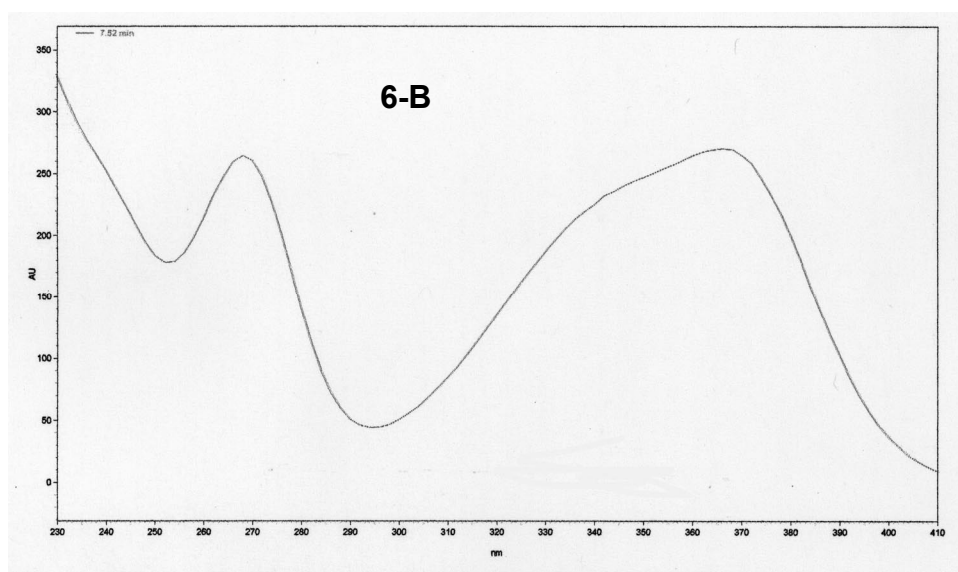

**Figure S1.** UV spectra (MeOH) of AFB FAPY bases **6-A** (top) and **6-B** (bottom).



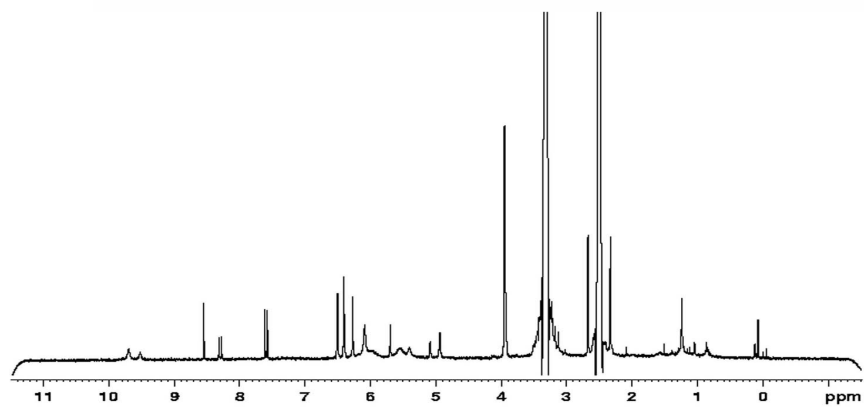

**Figure S2.** <sup>1</sup>H NMR (DMSO-*d*<sub>6</sub>) of FAPY base **6-A**.

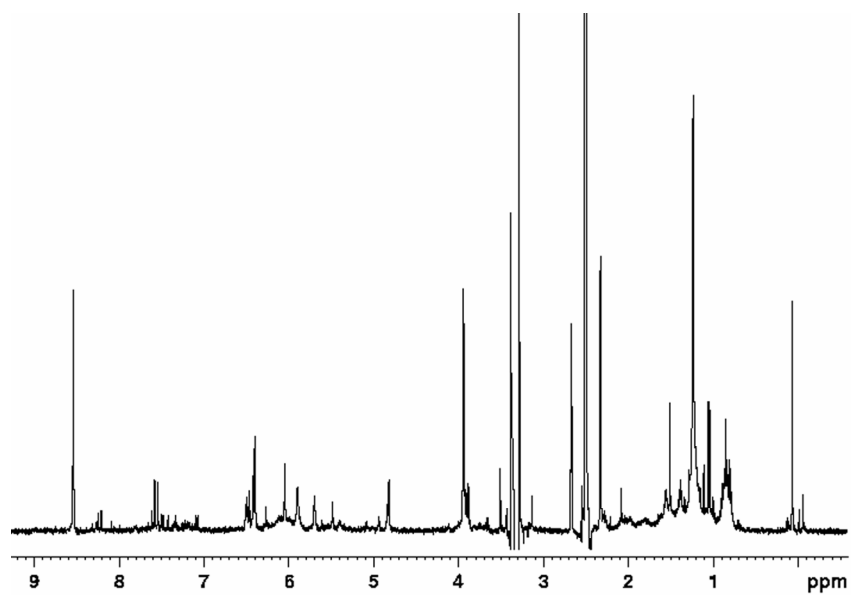

**Figure S3.** <sup>1</sup>H NMR (DMSO-*d*<sub>6</sub>) of FAPY base **6-B**.

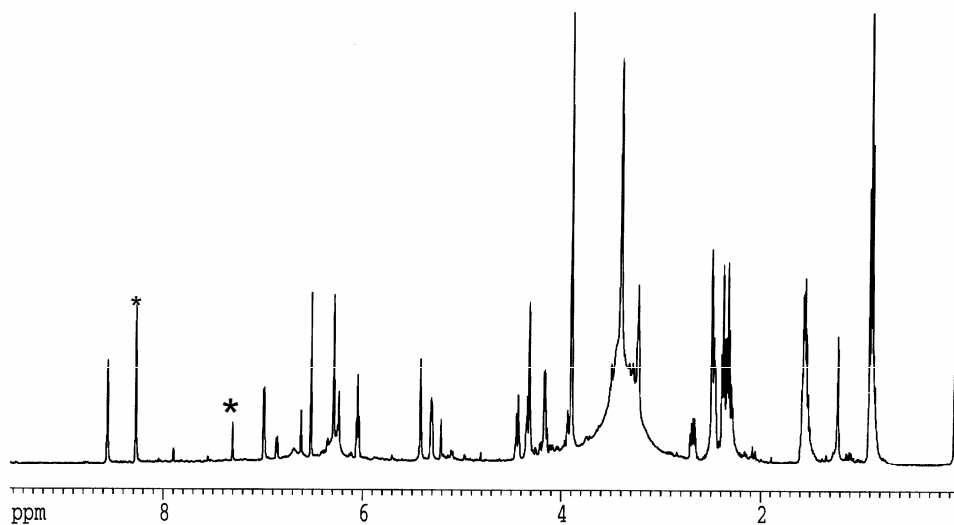

**Figure S4.**  $^1\text{H}$  NMR ( $\text{DMSO}-d_6$ ) spectrum of AFB-dGuo N7 adduct **10**. Asterisks indicate impurities.

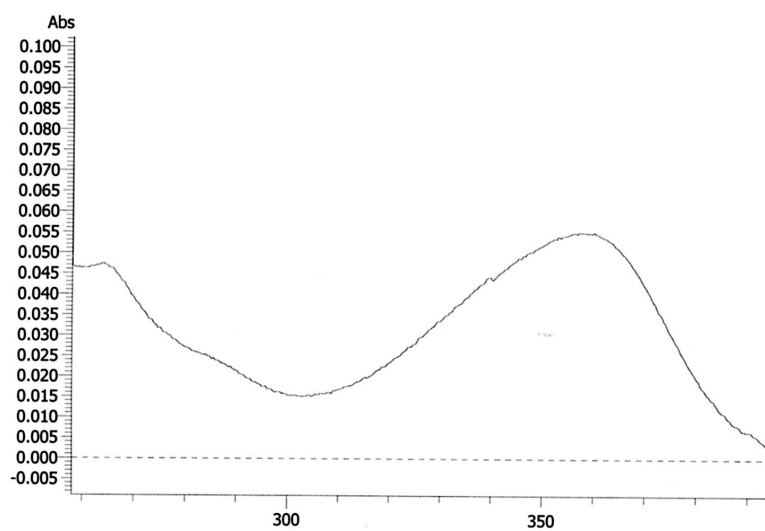

**Figure S5.** UV (MeOH) spectrum of AFB-dGuo N7 adduct **10**.

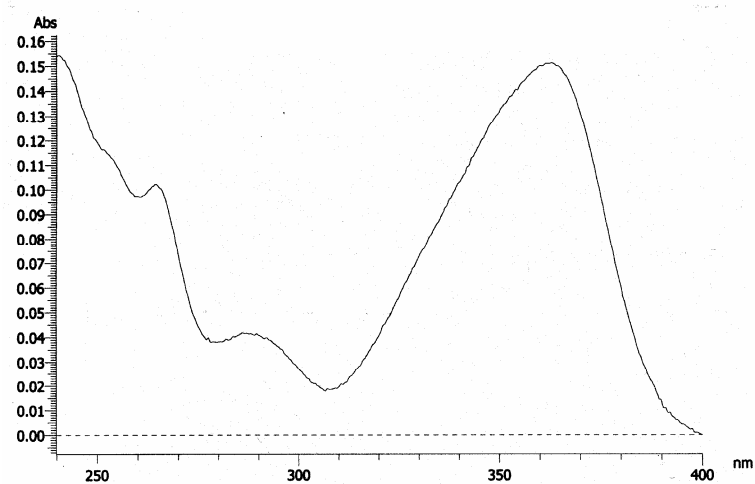

**Figure S6.** UV spectrum (MeOH) of AFB- $O^6$  dG 3',5' dibutyrate **11**.

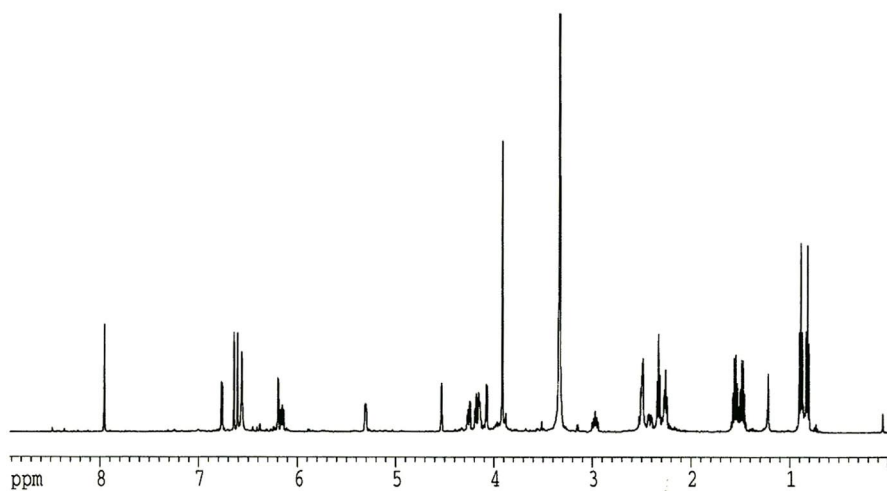

**Figure S7.**  $^1\text{H}$  NMR spectrum ( $\text{DMSO}-d_6$ ) of AFB- $O^6$  dG 3',5' dibutyrate **11**.

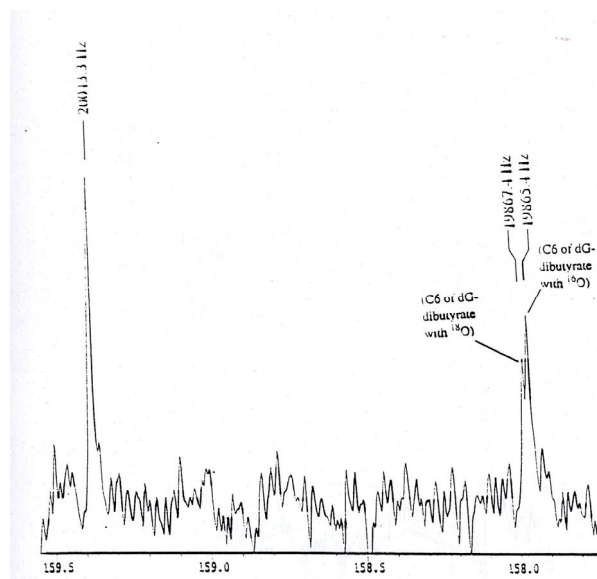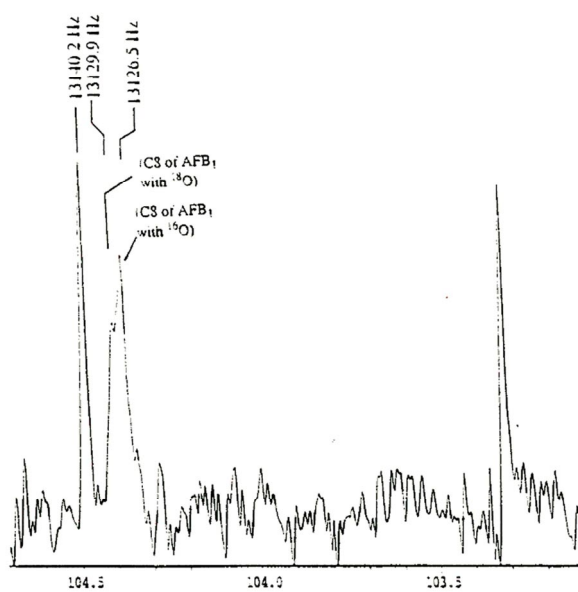

**Figure S8.** Comparison of the  $^{13}\text{C}$  chemical shifts of aflatoxin C6 (upper spectrum) and C8 (lower spectrum) in AFB- $O^6$  dGuo 3', 5' dibutyrate (**11**) with 6- $^{16}\text{O}$  and 6- $^{18}\text{O}$ .

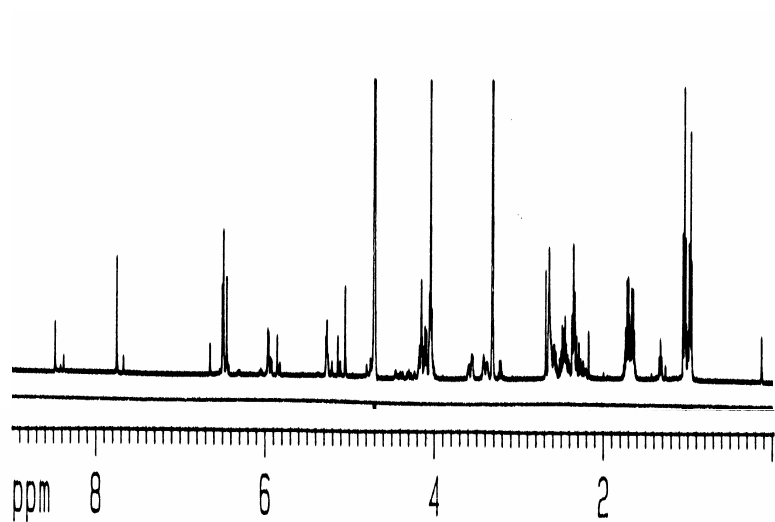

**Figure S9.**  $^1\text{H}$  NMR ( $\text{MeOH-}d_4/\text{DMSO-}d_6$ ) of AFB-FAPY dibutyrate **13-Aab** with minor amounts of **13-Bab**.

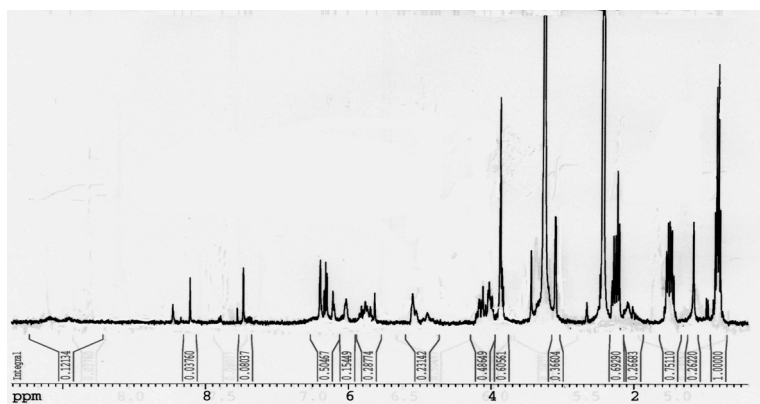

**Figure S10.**  $^1\text{H}$  NMR ( $\text{MeOH-}d_4/\text{DMSO-}d_6$ ) of AFB-FAPY dibutyrate **13-Bab** with minor amounts of **13-Aab**

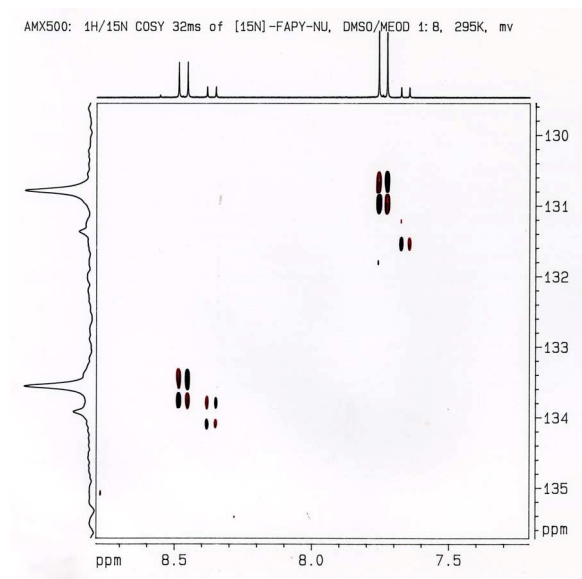

**Figure S11.**  $^1\text{H}$ - $^{15}\text{N}$  COSY of AFB-FAPY dG dibutyrate

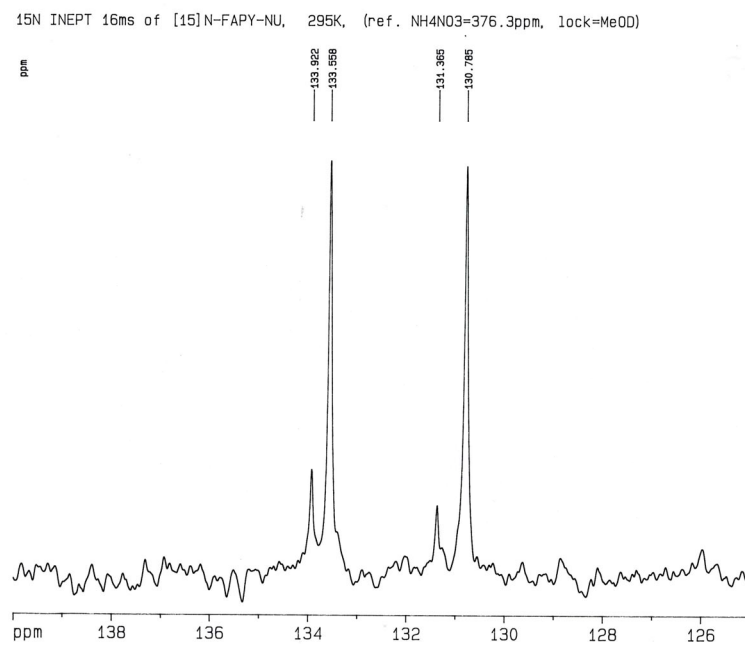

**Figure S12.**  $^{15}\text{N}$  INEPT spectrum of AFB-FAPY dGuo dibutyrate **13**.

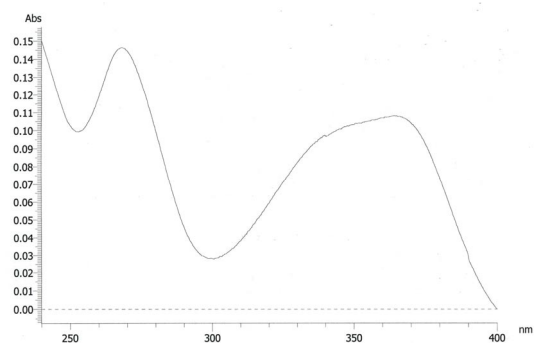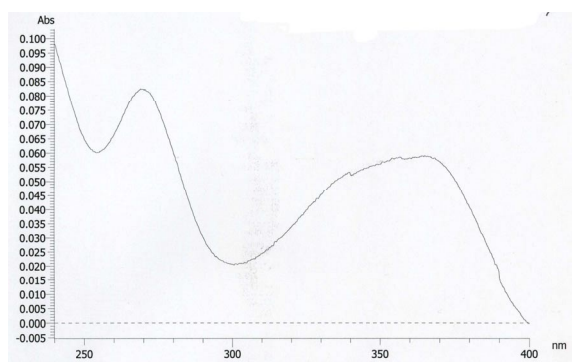

**Fig. S13.** UV spectra (MeOH) of AFB-FAPY dibutyrate **13-A** (top) and **13-B** (bottom).

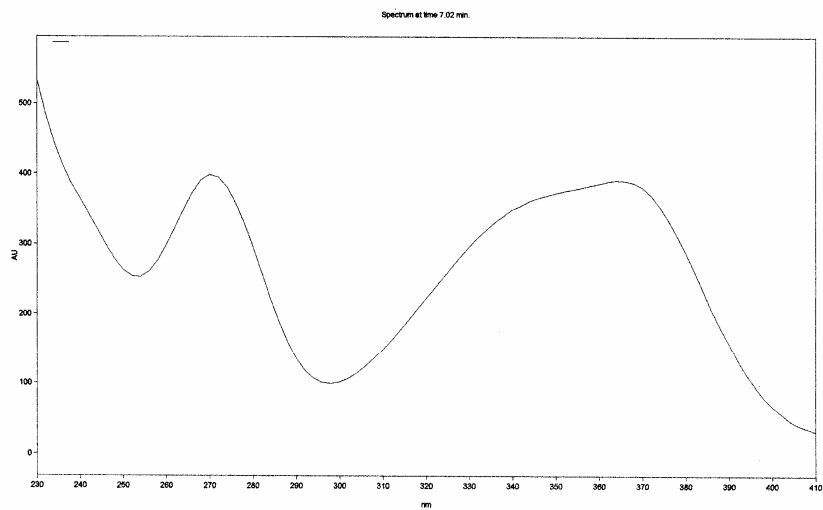

**Fig. S14.** UV spectrum of AFB-FAPY nucleoside **15**.

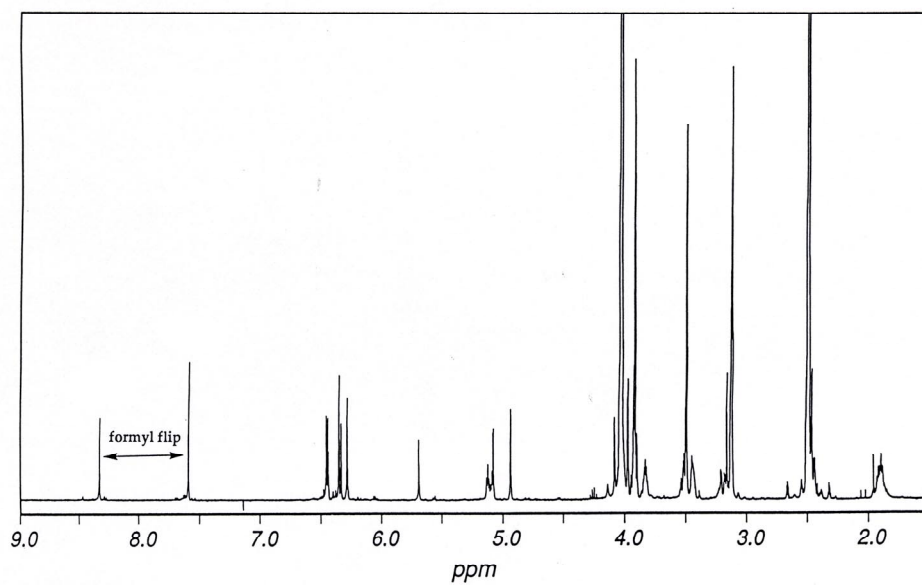

**Fig. S15.**  $^1\text{H}$  NMR of deprotected AFB-FAPY nucleoside **15**.



## References

1. Rance, M.; Sorensen, O. W.; Leupin, W.; Kogler, H.; Wuthrich, K.; Ernst, R. R. *J. Mag. Res.* **1985**, *61*, 67-80.
2. Bax, A.; Davis, D. G. *J. Mag. Res.* **1985**, *65*, 355-360.
3. Bax, A.; Davis, D. G. *J. Mag. Res.* **1985**, *63*, 207-213.
4. Bax, A.; Griffey, R. H.; Hawkins, B. L. *J. Mag. Res.* **1983**, *55*, 301-315.
5. Bax, A.; Subramanian, S. *J. Mag. Res.* **1986**, *67*, 565-569.

### Full text of reference 53 in the article:

53. Cho, Y. J.; Kim, H. Y.; Huang, H.; Slutsky, A.; Minko, I. G.; Wang, H.; Nechev, L. V.; Kozekov, I. D.; Kozekova, A.; Tamura, P.; Jacob, J.; Voehler, M.; Harris, T. M.; Lloyd, R. S.; Rizzo, C. J.; Stone, M. P. *J. Am. Chem. Soc.* **2005**, *127*, 17686-17696.
